# Supplementary material for: COVID-19 and Mental Health Among People Who Are Forcibly Displaced: The Role of Socioeconomic Insecurity
Source: Atypon-hosted journal article supplement (doi:10.1176/appi.ps.202200052), 2022-07-14
Supplement: appi.ps.202200052.ds001.pdf [file appi.ps.202200052.ds001.pdf]

### **COVID-19 Socio-Economic Insecurity Index**

**Income Insecurity.** Did your employment change because of Covid-19 (Corona)?

- a. No, it did not change – my employment status is the same as it was before the Corona
- b. Yes, I lost my job because of the Corona and I am currently unemployed
- c. Yes, I am now working fewer hours than I worked before the Corona
- d. Not relevant – I did not work before the Corona

\*Income Insecurity = b, c, and d

**Housing Insecurity.** Did your housing change because of COVID-19 (Corona)?

- a. No, it did not change – I am living in the same home where I have lived before the Corona
- b. Yes, I lost my home because of the Corona and was forced to find a new apartment
- c. Yes, although I was not forced to leave my home, other people moved into my apartment as new roommates
- d. Yes, I lost my home because of the Corona and I now do not have a regular place to sleep

\*Housing Insecurity = b, c, and d

**Food Insecurity.** Did you lose access to food because of Covid-19 (Corona)?

- a. No, I have enough food, like I had before the Corona
- b. Yes, I have less food to eat because of the Corona
- c. Yes, I do not have enough food to eat because of the Corona

\*Food Insecurity = b and c
